# Supplementary material
Source: publisher figshare collection journal article supplement (https://gsajournals.figshare.com/ndownloader/files/25619780)
Supplement: Supplementary file 1 [file 25619780]

#! /bin/bash

########## ########## ########## ########## CODE TO PERFORM INDIVIDUAL-BASED SIMULATIONS WITH SLIM v3.3 ON SLURM CLUSTER ########## ########## ########## ##########

########## DEFINE PARAMETERS HERE
#This setting corresponds to the simulation under the "basic model" of the introgression of a X-linked selected block and a "rod" neutral marker.
#From these simulations we obtain the strength of the barrier to neutral gene flow. 
chr="RodSSXchr"
N=100000
m=0.001
C=0.05
S=0.05
h=0.5
hM=0.5
g=10000
sr=0.5
a=1


########## MANAGE FOLDERS ON CLUSTER
cwd=$( pwd )

mkdir ${cwd}/outfiles_${chr}_L1-100_N${N}_m${m}_C${C}_S${S}_h${h}_hM${hM}_g${g}_sr${sr}_a${a}
cd ${cwd}/outfiles_${chr}_L1-100_N${N}_m${m}_C${C}_S${S}_h${h}_hM${hM}_g${g}_sr${sr}_a${a}

for L in "1" "2" "5" "10" "20" "50" "100"; do

mkdir ${cwd}/outfiles_${chr}_L1-100_N${N}_m${m}_C${C}_S${S}_h${h}_hM${hM}_g${g}_sr${sr}_a${a}/L${L}
cd ${cwd}/outfiles_${chr}_L1-100_N${N}_m${m}_C${C}_S${S}_h${h}_hM${hM}_g${g}_sr${sr}_a${a}/L${L}


########## SLiM CODE
cat > ModelIntrog${chr}_L${L}_N${N}_m${m}_C${C}_S${S}_h${h}_hM${hM}_g${g}_sr${sr}_a${a}.slim << EOM
// set parameters
initialize() {
	defineConstant("Nd",2);		// number of diploid individuals in the donor species, Nd
	defineConstant("Nr",${N});	// number of diploid individuals in the recipient species, Nr
	defineConstant("L",${L});	// number of locus, L: 1, 2, 5, 10, 20, 50, 100
	defineConstant("m",${m});	// migration rate, m
	defineConstant("C",${C});	// total recombination rate, Lc
	defineConstant("S",-${S}*2);	// total selection, Ls
	defineConstant("h",${h});	// dominance coefficient in Xx heterozygotes
	defineConstant("hM",${hM});	// dominance coefficient in Xy heterozygotes
	defineConstant("sr",${sr});	// sex ratio
	defineConstant("a",${a});	// marker-specific recombination scaler
	
	initializeSex(chromosomeType="X",xDominanceCoeff=hM);				// initialize males (XY) and females (XX), model sex chromosomes
	initializeMutationRate(rates=0);						// no mutation
	initializeMutationType(id="m1",dominanceCoeff=h,distributionType="f",S/L);	// neutral in p1, deleterious in p2 (wxx=1; WXx=1+hs; WXX=1+s; Wxy=1; WXy=1+hMs)
	initializeMutationType(id="m2",dominanceCoeff=h,distributionType="f",0.0);	// neutral marker
	m1.convertToSubstitution = F;							// do not remove mutations that get fixed
	m2.convertToSubstitution = F;							// do not remove markers that get fixed
	initializeGenomicElementType(id="g1",mutationTypes=m1,proportions=1.0);		// fraction 1.0 of selected loci (type m1)
	initializeGenomicElementType(id="g2",mutationTypes=m2,proportions=1.0);		// fraction 1.0 of neutral marker (type m2)
	initializeGenomicElement(genomicElementType=g1,start=0,end=L-1);		// initialize a genomic block (type g1) spanning the entire length
	initializeGenomicElement(genomicElementType=g2,start=L,end=L);			// initialize an extra genomic block (type g2) at the extremity
	initializeRecombinationRate(rates=c(C/L,(C/L)*a*L),ends=c(L-1,L));		// recombination rate per locus (null between X and Y chromosomes in males)
}

// create a donor species, p1 of size Nd, and a recipient species, p2 of size Nr
1 early() {
	sim.addSubpop(subpopID="p1",size=Nd,sexRatio=sr);
	sim.addSubpop(subpopID="p2",size=Nr,sexRatio=sr);
}

// mutations are neutral in the p1 genetic background, deleterious in the p2 background
fitness(m1, p1) { return 1.0; }

// p1 has mutations at every position
1 late() {
	for (g in p1.genomes)
	{	
		if(g.isNullGenome == "F")
		{
			g.addNewDrawnMutation(mutationType=m1,position=0:(L-1));
		}
	}
}

// steady migration from p1 to p2
2: early() {
	p1.setMigrationRates(sourceSubpops=p2,rates=0.0);	// no migration into p1
	p2.setMigrationRates(sourceSubpops=p1,rates=m);		// migration into p2
}

// after migration-selection balance is reached (<10000 generations) p1 has a neutral mutation at the last position
10001 late() {
	for (g in p1.genomes)
	{	
		if(g.isNullGenome == "F")
		{
			g.addNewDrawnMutation(mutationType=m2,position=L:L);
		}
	}
}

// record things every 100 generations
1:20000 late() {
	if (sim.generation % 100 == 0) {
		// total number of donor alleles in the recipient species
		pRTotal = NULL;
		nRTotal = NULL;
		for (pRg in p2.genomes)
		{
			if(pRg.isNullGenome == "F")
			{
				pRTotal = c(pRTotal, sum(pRg.countOfMutationsOfType(m1)));
				nRTotal = c(nRTotal, sum(pRg.countOfMutationsOfType(m2)));
			}
		}
		catn(sum(pRTotal) + "\t" + sum(nRTotal));
	}
}

// run to last generation and record things
20000 late() {
		// average frequency of pD mutations in the donor species: sum(pDTotal) / (N * 2 * sr * L + N * sr * L)
		// total number of pD mutations in the donor species
		pDTotal = NULL;
		nDTotal = NULL;
		for (pDg in p1.genomes)
		{
			if(pDg.isNullGenome == "F")
			{
				pDTotal = c(pDTotal, sum(pDg.countOfMutationsOfType(m1)));
				nDTotal = c(nDTotal, sum(pDg.countOfMutationsOfType(m2)));
			}
		}
		pDgLe = p1.genomes.size()*sr + p1.genomes.size()*sr*0.5;
		catn("Total number of pD/nD mutations in pD species: " + sum(pDTotal) + "\t" + sum(nDTotal));
		catn("Total number of X in pD species: " + pDgLe * L);

		// average frequency of pD mutations in the recipient species: sum(pRTotal) / (N * 2 * sr * L + N * sr * L)
		// equivalent to "mean(sim.mutationFrequencies(p2))" with a single mutation type
		// total number of pD mutations in the recipient species
		pRTotal = NULL;
		nRTotal = NULL;
		for (pRg in p2.genomes)
		{
			if(pRg.isNullGenome == "F")
			{
				pRTotal = c(pRTotal, sum(pRg.countOfMutationsOfType(m1)));
				nRTotal = c(nRTotal, sum(pRg.countOfMutationsOfType(m2)));
			}
		}
		pRgLe = p2.genomes.size()*sr + p2.genomes.size()*sr*0.5;
		catn("Total number of pD/nD mutations in pR species: " + sum(pRTotal) + "\t" + sum(nRTotal));
		catn("Total number of X in pR species: " + pRgLe * L);

		pRTotalM = NULL;
		pRTotalF = NULL;
		nRTotalM = NULL;
		nRTotalF = NULL;
		for (i in p2.individuals)
		{
			if(i.sex == "M")
			{
				for (pRg in i.genomes)
				{
					if(pRg.isNullGenome == "F")
					{
						pRTotalM = c(pRTotalM, sum(pRg.countOfMutationsOfType(m1)));
						nRTotalM = c(nRTotalM, sum(pRg.countOfMutationsOfType(m2)));
					}
				}
			}else{
				pRTotalF = c(pRTotalF, sum(i.genomes.countOfMutationsOfType(m1)));
				nRTotalF = c(nRTotalF, sum(i.genomes.countOfMutationsOfType(m2)));
			}			
		}
		pRgLeM = p2.genomes.size()*sr*0.5;
		pRgLeF = p2.genomes.size()*sr;
		catn("Total number of pD/nD mutations in pR males: " + sum(pRTotalM) + "\t" + sum(nRTotalM));
		catn("Total number of X in pR males: " + pRgLeM * L);
		catn("Total number of pD/nD mutations in pR females: " + sum(pRTotalF) + "\t" + sum(nRTotalF));
		catn("Total number of X in pR females: " + pRgLeF * L);

		// frequency of pD mutations by position in the recipient species
		// equivalent to "sim.mutationFrequencies(p2)" with a single mutation type
		pRCounts = integer(L);
		for (pRg in p2.genomes)
		{
			if(pRg.isNullGenome == "F")
			{pRCounts = pRCounts + integer(L,0,1,pRg.positionsOfMutationsOfType(m1));}
		}			
		maxCount = pRgLe;
		pRFractions = pRCounts / maxCount;
		catn("Frequency of pD mutations by position in pR species:");
		catn(format("%.3f", pRFractions));

		// average length of pD blocks in the recipient species (assuming that they are single & contiguous)
		leBlock = NULL;
		for (pRg in p2.genomes)
		{
			if(pRg.isNullGenome == "F")
			{leBlock = c(leBlock, size(pRg.positionsOfMutationsOfType(m1)));}
		}
		catn("Average length of pD blocks in pR species: " + mean(leBlock));
		
		// average number of pD mutations per haplotype in the recipient species
		nbMut = NULL;
		for (pRg in p2.genomes)
		{
			if(pRg.isNullGenome == "F")
			{nbMut = c(nbMut, pRg.countOfMutationsOfType(m1));}
		}
		pRMean = mean(nbMut);
		catn("Average number of pD mutations in pR species per haplotype: " + pRMean);
		
		// Barton's 1983 statistic: sum(y_from_1_to_L) of y * p(y) / L 
		ocBlock = NULL;
		uBlock = unique(leBlock);
		for (u in uBlock)
		{
			ocBlock = c(ocBlock, size(which(leBlock == u)));
		}
		catn("Barton's 1983 average frequency: " + sum(uBlock * (ocBlock / (size(p2.individuals) * 2 * sr + size(p2.individuals) * sr))) / L + "\n");

		// list of introgressed blocks
		/*catn("List of introgressed blocks:");
		cnt = 0;
		for (g in p2.genomes)
		{
			if(g.isNullGenome == "F")
			{	
				cnt = cnt + 1;
				if ( size(g.positionsOfMutationsOfType(m1)) > 0 )
				{	
					catn(g.positionsOfMutationsOfType(m1));
					catn(g.mutations.selectionCoeff);
				}
				if(cnt % 2 == 0){catn("**********");}
			}
		}*/

		// show full output
		//sim.outputFull();
}

EOM


########## SLURM JOB
cat > slurm_slim.sh << EOM
#!/bin/bash
#SBATCH --job-name=slimRodSSXchr\${1}
#SBATCH --time=24:00:00
#SBATCH --mem=2G
#SBATCH --export=NONE
unset SLURM_EXPORT_ENV
export OMP_NUM_THREADS=\${SLURM_CPUS_PER_TASK}

slim ModelIntrog${chr}_L${L}_N${N}_m${m}_C${C}_S${S}_h${h}_hM${hM}_g${g}_sr${sr}_a${a}.slim > out.${chr}_L${L}_N${N}_m${m}_C${C}_S${S}_h${h}_hM${hM}_g${g}_sr${sr}_a${a}.slim.\${1}

EOM


########## SUBMIT 100 REPLICATES
for i in {1..100..1}; do sbatch slurm_slim.sh ${i}; done


done

########## ########## ########## ########## ########## ########## ########## ########## ########## ########## ########## ########## ########## ########## ##########
